# Supplementary material
Source: PubMed Central journal article supplement (PMC3147295)
Supplement: NIHMS306972-supplement-01.pdf [file NIHMS306972-supplement-01.pdf]

**Supplementary Table 1: Baseline Characteristics between Study Participants and Excluded****Subjects**

| Characteristic                    | Study Participants<br>(n = 1938) | Excluded Subjects<br>(n = 2754 ) | P      |
|-----------------------------------|----------------------------------|----------------------------------|--------|
| Age(years)                        | 73.5±4.5                         | 75.8±5.6                         | <0.001 |
| Males                             | 30                               | 51                               | <0.001 |
| Race                              |                                  |                                  | <0.001 |
| Caucasian                         | 86                               | 80                               |        |
| African-American                  | 14                               | 20                               |        |
| Hypertension                      | 54                               | 59                               | <0.001 |
| Diabetes                          | 11                               | 19                               | <0.001 |
| Smoking<br>(current or past)      | 50.1                             | 57.6                             | <0.001 |
| Medication use                    |                                  |                                  |        |
| Anti-hypertensive                 | 39                               | 59                               | <0.001 |
| Statin                            | 4.6                              | 4.7                              | 0.93   |
| BMI (kg/m <sup>2</sup> )          | 26.8±4.6                         | 26.9±4.9                         | 0.55   |
| LDL (mg/dL)                       | 128.5±32.3                       | 126±34.9                         | 0.03   |
| HDL (mg/dL)                       | 55.5±14.5                        | 51.7±14.2                        | <0.001 |
| eGFR (mL/min/1.73m <sup>2</sup> ) | 76.7±17.6                        | 69.7±19.2                        | <0.001 |

Continuous data presented as means ±standard deviation, Categorical as number %

Abbreviations: BMI, Body Mass Index; LDL, low-density lipoprotein; HDL, High-Density Lipoprotein; eGFR, estimated glomerular filtration rate; PTH, Parathyroid Hormone; 25-OHD, 25-hydroxyvitamin D.

**Supplementary Table 2: Significant Predictors of Phosphate Concentration in Multivariate Linear Regression**

| Characteristic                            | Coefficient | 95% CI          | P-value |
|-------------------------------------------|-------------|-----------------|---------|
| Female Sex                                | 0.40        | 0.35 – 0.44     | <0.001  |
| Body Mass Index (per kg/m <sup>2</sup> )  | -0.01       | -0.005 – -0.014 | <0.001  |
| Systolic Blood Pressure (per 10 mmHg)     | -0.02       | -0.003 – -0.03  | 0.01    |
| eGFR (per 10 ml/min/1.73 m <sup>2</sup> ) | -0.04       | -0.02 – -0.05   | <0.001  |
| Low-Density Lipoprotein (per 10 mg/dl)    | 0.01        | 0.004 – 0.02    | <0.001  |
| Parathyroid Hormone (per 10 pg/dl)        | -0.03       | -0.02 – -0.04   | <0.001  |

Positive coefficients indicate a direct relationship between the characteristic and higher serum phosphate level.

Abbreviations: eGFR, estimated glomerular filtration rate
